# Supplementary material
Source: publisher figshare collection journal article supplement (https://sage.figshare.com/ndownloader/files/14144876)
Supplement: Supplementary file 1 [file 14144876]

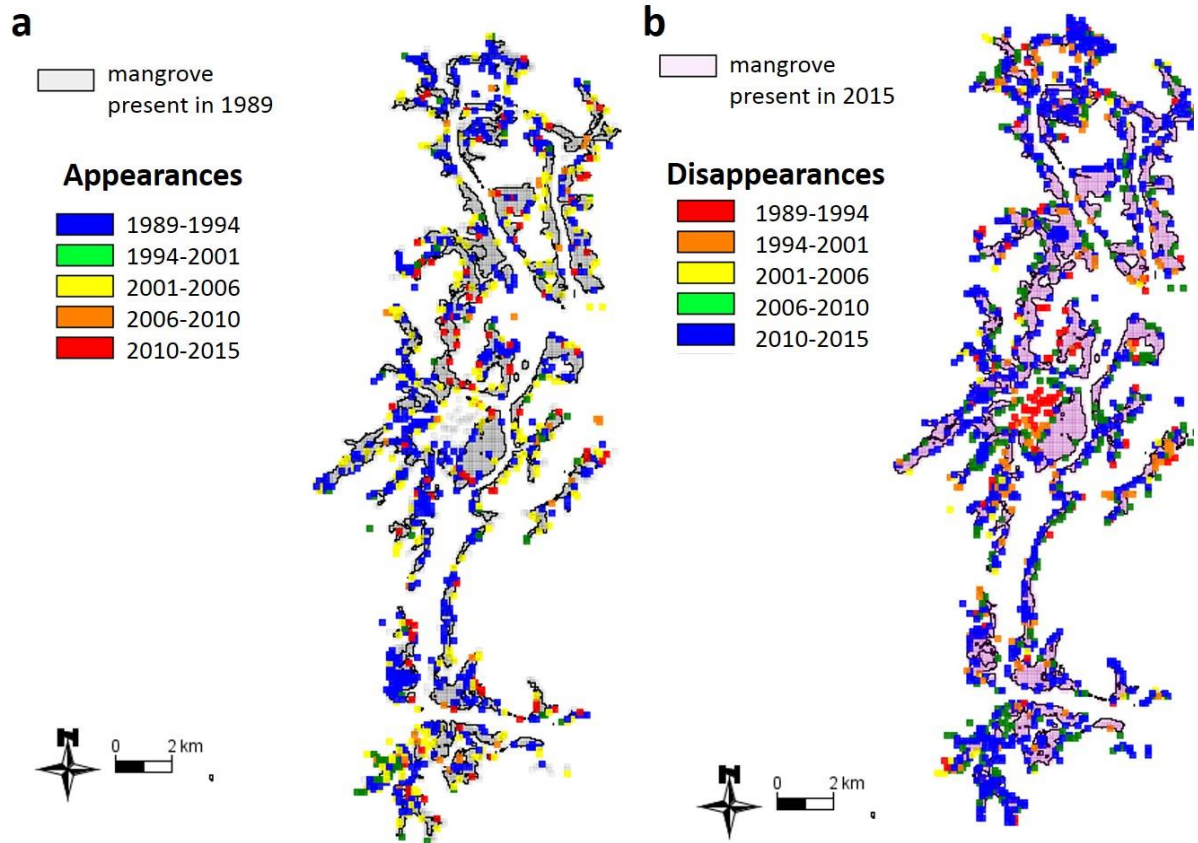

Appendix 2: Maps of the mangrove areas that a) appears and b) disappears for each period in the Santa Cruz Channel.
